# Supplementary material for: Comparison of hourly surface downwelling solar radiation estimated from MSG/SEVIRI and forecast by RAMS model with pyranometers over Italy
Source: Copernicus journal article supplement (doi:10.5194/amt-2017-9), 2017-02-23
Supplement: Supplementary file [file amt-2017-9-AC2-supplement.pdf]

We acknowledge Stephen Saleeby for the precise comment on the RAMS (Regional Atmospheric Modeling System) used in this paper. Our answer is detailed below.

The motivation to use this specific version of the RAMS model is that this model is operational at ISAC-CNR and we aimed to test this specific version. This model uses the WSM6 microphysical scheme that was interfaced with RAMS at ISAC-CNR (Federico, 2016) and that has good performance over Italy. Other parameterizations were included in the RAMS model at ISAC-CNR, as the lightning scheme (Federico et al., 2014); these parameterizations, however, do not play a role for the present study.

Of course, we acknowledge the important developments that were done at the CSU (CSU-RAMS), and that should improve the model performance for the GHI forecast. The comparison between the RAMS used in this paper and the CSU-RAMS will be performed soon, to support quantitatively the difference (and the expected improvement) among the two models.

For this paper, following also the comment of the first reviewer, we added a comment on the expected improvement using the latest development included in CSU-RAMS. We will write in the “Summary and Conclusions” section:

The results of this paper are representative of the current operational implementation at ISAC-CNR. There have been, however, recent improvements to the RAMS model (CSU-RAMS, <http://vandenheever.atmos.colostate.edu/vdhp/rams.php>) that will be explored in future studies to improve the GHI forecast. The errors of the RAMS forecast for the GHI can be divided in three main components: a) errors in the prediction of the cloud coverage; b) errors in the simulation of the interaction between the radiation and the clouds; c) the aerosol effects on the GHI.

As shown by the results of this and others papers, the relative error when the cloud coverage is not well represented is of the order of the GHI (100%). Errors by both physical and numerical parameterizations of the model, but also errors in the initial and boundary conditions contribute to this issue. In particular, the microphysical scheme influences the whole simulation through a multitude of dynamic, radiative, thermodynamic and microphysics processes. The WSM6 scheme used in this paper is a single-moment scheme, predicting the mixing ratios of six hydrometeors (vapor, cloud, rain, graupel, ice, snow). The WSM6 gave better performance compared to other single-moment microphysics schemes included in RAMS for twenty cases over Italy characterized by widespread convection and, for this reason, is used in the operational implementation at ISAC-CNR. However, the inability of single-moment schemes to allow the number concentration and mean diameter of hydrometeors to vary independently limits their ability to simulate clouds with characteristics consistent with observations across a wide range of atmospheric conditions. Also, the sensitivity of these schemes to fixed parameters as, for example, the number concentration of the hydrometeors, is high (Igel et al., 2014).

When both the mixing-ratio and number concentration can be predicted, as in double-moment schemes, the description of the physical processes as condensation, collision-coalescence, and sedimentation is improved. For this reason, double-moment schemes outperform single-moment schemes as shown in several studies (Igel et al., 2014 and references therein).

The CSU-RAMS model includes a double-moment microphysics scheme (Meyers et al., 1997) that could improve the prediction of the cloud coverage and will be considered in future studies.

Also, the cumulus parameterization scheme has an important role on the NWP forecast, especially for cloud prediction. In addition to the Kuo scheme, used in this paper for the first domain, RAMS

implements the Kain-Fritsch scheme (Castro et al., 2005). This scheme will be used in future studies to assess the sensitivity of the performance to the choice of the cumulus parameterization scheme. Another important point to consider for improving the model performance of the GHI forecast is the change in the optical properties of the clouds when the liquid and ice phases are considered in the radiative scheme (Harrington et Olsson, 2001; Sun and Shine, 1995). The Chen and Cotton scheme (Chen and Cotton, 1983) used in this paper, while fast and efficient from the computational point of view, considers the total condensate in the atmosphere but not the phase of the water (i.e. ice, liquid or mixed). Numerical and observational experiments (Harrington et Olsson, 2001; Sun and Shine, 1995) shows that the impact of the water phase is significant for the computation of the GHI because the absorption and emissions are largely reduced in ice compared to liquid path with the same water path, leading to a surface net radiative impact of  $60 \text{ W/m}^2$  for a case of an Arctic Stratus Cloud simulated by RAMS.

Finally, our radiative scheme neglects the impact of the aerosols. This impact, however, can be very important. For example Lara-Fanego et al. (2011) show that the overestimation of the GHI by WRF over Andalusia in clear sky conditions was caused by the underestimation of the aerosol optical depth (AOD), which was assumed 0.1 for their experiments. Zamora et al. (2005) showed that a doubling of the AOD considered in the Dudhia scheme (Dudhia, 1989) was responsible for a decrease of the GHI of about  $100 \text{ W/m}^2$  at the solar noon. Kosmopoulos et al. (2017) investigates the impact of an extremely high dust event (maximum AOD 3.5), occurred from 30 January to 3 February 2015 over Greece. For this event, they found an attenuation of the GHI up to 40-50 %, being the attenuation almost equally distributed in the UV, visible and infrared portion of the spectrum. They also show that, for climatological conditions, the attenuation of the GHI by the aerosol load is less than 10%. Considering the above results and the fact that the RMSE statistic used in this paper is sensitive to large errors, an important impact of the aerosols is expected for the statistics of this paper. The Harrington et al. (1997) radiation scheme is aerosol sensitive, is available in CSU-RAMS, and will be tested in future studies.

## References

- Federico, S., 2016: Implementation of the WSM5 and WSM6 single moment microphysics scheme into the RAMS model: verification for the HyMeX-SOP1, *Advances in Meteorology*. Volume 2016 (2016), Article ID 5094126, 17 pages <http://dx.doi.org/10.1155/2016/5094126>.
- Federico, S., Avolio, E., Petracca, M., Panegrossi, G., Sanò, P., Casella, D., Dietrich, S., 2014: Simulating lightning into the RAMS model: implementation and preliminary results, *Nat. Hazards Earth Syst. Sci.*, i14, 2933-2950. doi:10.5194/nhess-14-2933-2014.
